# Supplementary material
Source: publisher site journal article supplement (https://www.dovepress.com/get_supplementary_file.php?f=240343.docx)
Supplement: Supplementary file 1 [file get_supplementary_file.php]

Supplementary Materials

Supplementary Table 1. Patient characteristics

|  | **All Patients**  **N=239** | **Endostapler groups** | | |
| --- | --- | --- | --- | --- |
| **Group 1**  N=82 | **Group 2**  N=94 | **Group 3**  N=63 |
| **Male, n (%)** | 163(68.2) | 75 (91.5) | 50 (53.2) | 38 (60.3) |
| **Mean±SD age, years (range)** | 68.3±9.4 (36–88) | 68.8±9.8 | 68.2±9.6 | 69.4±8.4 |
| **Pathology (ad, sq, adsq, large)** | 184, 51, 3, 1 | 63, 18, 0, 1 | 74, 18, 2, 0 | 47, 15, 1, 0 |
| **VATS, n (%)** | 207 (86.6) | 66 (80.5) | 83 (88.3) | 58 (92.1) |
| RUL | 198 (82.8) | 64 (78.0) | 81 (86.2) | 53 (84.1) |
| RUL+RLL(S6) | 5 (2.1) | 1 (1.2) | 1 (1.1) | 3 (4.8) |
| RUL+RML | 9 (3.8) | 1 (1.2) | 1 (1.1) | 7 (11.1) |
| **Open chest, n (%)** | 32 (13.4) | 16 (19.5) | 11 (11.7) | 5 (7.9) |
| RUL | 13 (5.4) | 7 (8.5) | 5 (5.3) | 1 (1.6) |
| Sleeve RUL | 6 (2.5) | 2 (2.4) | 1 (1.1) | 3 (4.8) |
| RUL+chest walls | 8 (3.3) | 4 (4.9) | 3 (3.2) | 1 (1.6) |
| RUL+chest wall+vertebra | 1 (0.4) | 1 (1.2) | - | - |
| RUL+RML | 1 (0.4) | 1 (1.2) | - | - |
| RUL+RML+RLL(S6) | 1 (0.4) | 1 (1.2) | - | - |
| RUL+SVC | 1 (0.4) | - | 1 (1.1) | - |
| RUL+RLL(S6) | 1 (0.4) | - | 1 (1.1) | - |
| **Smoker** | - |  |  |  |
| Current and ex | 102 (42.7) | 37 (45.1) | 40 (42.6) | 25 (39.7) |
| Non-smoker | 137 (57.3) | 45 (54.9) | 54 (57.4) | 38 (60.3) |
| **Brinkman’s Index** | - | 287.6 | 160.1 | 168.4 |
| **Pathological stage (AJCC 8th edition)** | - |  |  |  |
| 1A1 | 50 (20.9) | 18 (22.0) | 21 (22.3) | 11 (17.5) |
| 1A2 | 70 (29.3) | 25 (30.5) | 33 (35.1) | 12 (19.0) |
| 1A3 | 46 (19.2) | 13 (15.9) | 18 (19.1) | 15 (23.8) |
| 1B | 29 (12.1) | 10 (12.2) | 12 (12.8) | 7 (11.1) |
| 2A | 23 (9.6) | 8 (9.8) | 7 (7.4) | 8 (12.7) |
| 2B | 15 (6.3) | 4 (4.9) | 2 (2.1) | 9 (14.3) |
| 3A | 5 (2.1) | 3 (3.7) | 1 (1.1) | 1 (1.6) |
| 3B | 1 (0.4) | 1 (1.2) | - | - |
| **Micro lymphovascular invasion** | **-** |  |  |  |
| Yes | 62 (25.9) | 22 (26.8) | 17 (18.1) | 23 (36.5) |

Ad, adenocarcinoma; adsq, adenosquamous cell carcinoma; AJCC, American Joint Committee on Cancer; large, large cell carcinoma; RLL, right lower lobectomy; RML, right middle lobectomy; RUL, right upper lobectomy; sq, squamous cell carcinoma; VATS, video-assisted thoracoscopic surgery. Group 1 - Ethicon’s ECHELON FLEX™Powered Vascular Stapler (PVS), Group 2 – Medtronic’s powered Endo-GIA™ iDrive™ stapler (using white, gray and tan cartridges); and Group 3 – Endo-GIA™ Universal (using white, gray and tan cartridges) and ECHELON FLEX™ ENDOPATH® (using white cartridges only) manual staplers.

Supplementary Table 2. Comparison of staple characteristics

| **Staple Characteristic** | **Staple Cartridge Type** | | |
| --- | --- | --- | --- |
| **ECHELON ENDOPATH® VASECR35** | **Endo-GIA™ 45CTAV (gray cartridge)** | **ECHELON ENDOPATH® ECR45W** |
| 1. Leg length (mm) | 2.50 | 1.00-2.00-2.00* | 2.50 |
| 2. Crown length (mm) | 3.00 | 3.00 | 3.00 |
| 3. Closed staple height (mm) | 1.00 | 0.75 | 1.00 |
| 4. Staple diameter (mm) | 0.20 | 0.22 | 0.23 |
| 5. Pitch width (mm) | 0.20 | ~1 | ~1 |
| Number of staples | 36 | 48 | 70 |

Staple measurements were made at Ishikawa Prefectural Central Hospital by the investigator.
